# Supplementary material
Source: Springer Nature journal article supplement (https://www.springermedizin.de/resource/supplementary/12961_2012_232_MOESM2_ESM.pdf/9570856)
Supplement: MOESM2 [file 9570856]

## **Stage 0: Joint preparation**

- Needs, expectations, purpose, values, roles

## **Stage 1: First process and Contribution Mapping**

Step 1. Introduction

Step 2. The research team

Step 3. Three-phase process mapping

- **Formulate phase**

- Vision, aims, activities, actors, alignment

- **Production phase**

- Activities, actors, alignment, main results

- **Knowledge extension phase**

- Projected contributions

- Initiated dissemination and utilization

- Dissemination and utilization by *linked actors*

Step 4. First Contribution Mapping

- **Change in involved and *linked actors***

- **Knowledge products**

- **Contributions through linked utilization**

- **Indications of utilization at-a-distance**

## **Stage 2: Exploring and triangulation contributions**

Step 5. Interviewing potential *key users*

Step 6. Triangulating contributions

## **Stage 3: Co-producing and sharing results**

Step 7. Analyzing alignment efforts

Step 8. Inviting feedback and validation

Step 9. Clarifying and describing inconsistencies

Step 10. Sharing results for learning, improvement and accountability
